# Supplementary material
Source: Elsevier journal article supplement (https://www.sciencedirect.com/science/article/pii/S225488742100062X)
Supplement: mmc1 [file S225488742100062X:mmc1.pdf]

## Anexo 1: Acrónimos y siglas

|                |                                                                           |
|----------------|---------------------------------------------------------------------------|
| <b>AEMPS</b>   | <b>Agencia Española de Medicamentos y Productos Sanitarios</b>            |
| <b>ATC</b>     | <b>Clasificación Anatómica Terapéutica Química</b>                        |
| <b>DDD</b>     | <b>Dosis Diarias Definidas</b>                                            |
| <b>DHD</b>     | <b>Dosis Diarias Definidas por mil Habitantes</b>                         |
| <b>DID</b>     | <b>Daily Doses Defined by thousands of Inhabitants</b>                    |
| <b>ECDC</b>    | <b>Centro Europeo para la Prevención y Control de Enfermedades</b>        |
| <b>ESAC</b>    | <b>Proyecto Europeo de Vigilancia del Consumo de Antimicrobianos</b>      |
| <b>ISFAS</b>   | <b>Instituto Social de las Fuerzas Armadas</b>                            |
| <b>J01</b>     | <b>Antibacterianos para uso sistémico</b>                                 |
| <b>J01B/N</b>  | <b>Ratio de prescripción de antibióticos de amplio espectro</b>           |
| <b>J01C</b>    | <b>Penicilinas</b>                                                        |
| <b>J01CA</b>   | <b>Penicilinas de amplio espectro</b>                                     |
| <b>J01CA01</b> | <b>Ampicilina</b>                                                         |
| <b>J01CA04</b> | <b>Amoxicilina</b>                                                        |
| <b>J01CR</b>   | <b>Penicilinas e inhibidores de la betalactamasa</b>                      |
| <b>J01D</b>    | <b>Cefalosporinas</b>                                                     |
| <b>J01DD</b>   | <b>Tercera generación de cefalosporinas</b>                               |
| <b>J01FA</b>   | <b>Macrólidos</b>                                                         |
| <b>J01M</b>    | <b>Quinolonas</b>                                                         |
| <b>J01MA</b>   | <b>Fluoroquinolonas</b>                                                   |
| <b>J01SV</b>   | <b>Indicador de variación estacional aplicado a la prescripción total</b> |
| <b>J01XX</b>   | <b>Otros antibacterianos</b>                                              |
| <b>J01XX01</b> | <b>Fosfomicina</b>                                                        |
| <b>MUFACE</b>  | <b>Mutualidad General de Funcionarios Civiles del Estado</b>              |
| <b>OMS</b>     | <b>Organización Mundial de la Salud</b>                                   |
| <b>PRAN</b>    | <b>Plan Nacional frente a la Resistencia a los Antibióticos</b>           |
| <b>PVP</b>     | <b>Precio de Venta al Público</b>                                         |
| <b>SPSS</b>    | <b>Statistical Package for the Social Science</b>                         |
| <b>TSI</b>     | <b>Tarjeta Sanitaria Individual</b>                                       |
| <b>TSI 002</b> | <b>Pensionistas de renta baja y media</b>                                 |
| <b>TSI 003</b> | <b>Activos de renta baja</b>                                              |
| <b>TSI 004</b> | <b>Activos de renta media</b>                                             |
| <b>TSI 005</b> | <b>Activos y pensionistas de renta alta</b>                               |
